# Supplementary material for: Reactions of a gold(i) thiolate complex [Au(Tab)2]2(PF6)2(Tab = 4-(trimethylammonio)benzenethiolate) with diphosphine ligands
Source: Royal Society of Chemistry journal article supplement (doi:10.1039/c0dt00620c), 2010-12-01

## Supporting Information

### Reactions of a gold(I) thiolate complex $[\text{Au}(\text{Tab})_2]_2(\text{PF}_6)_2$ (Tab = 4-(trimethylammonio)benzenethiolate) with diphosphine ligands†

**Ai-Xia Zheng,<sup>a</sup> Zhi-Gang Ren,<sup>a</sup> Ling-Ling Li,<sup>a</sup> Hai Shang,<sup>a</sup> Hong-Xi Li,<sup>a</sup> and Jian-Ping  
Lang<sup>\*a,b</sup>**

<sup>a</sup> *College of Chemistry, Chemical Engineering and Materials Science, Suzhou University, Suzhou  
215123, P. R. China. Fax: 86-512-65880089; E-mail: jplang@suda.edu.cn*

<sup>b</sup> *State Key Laboratory of Coordination Chemistry, Nanjing University, Nanjing 210093, P. R.  
China*

ESI mass spectrum of compound 1

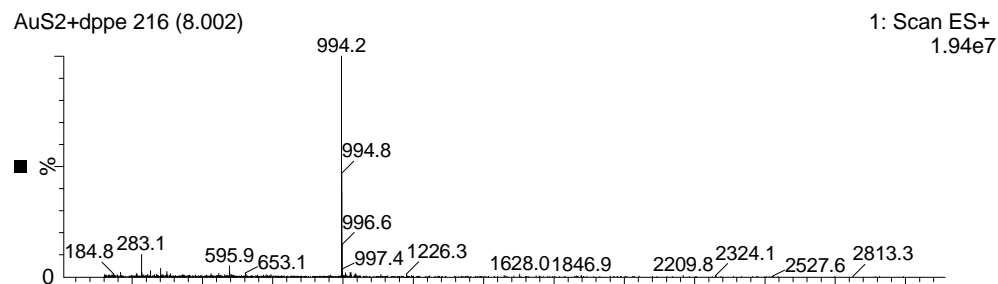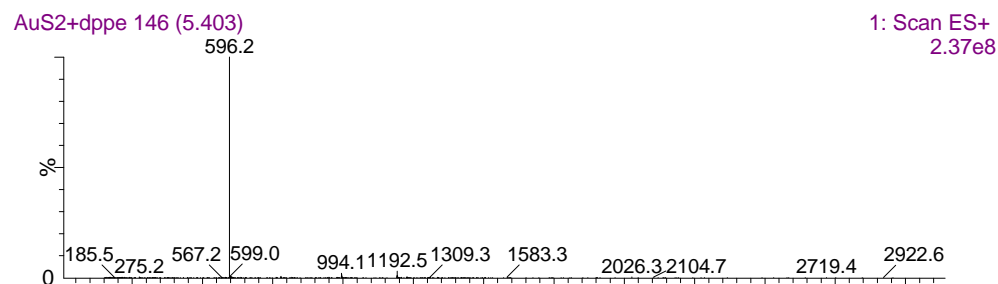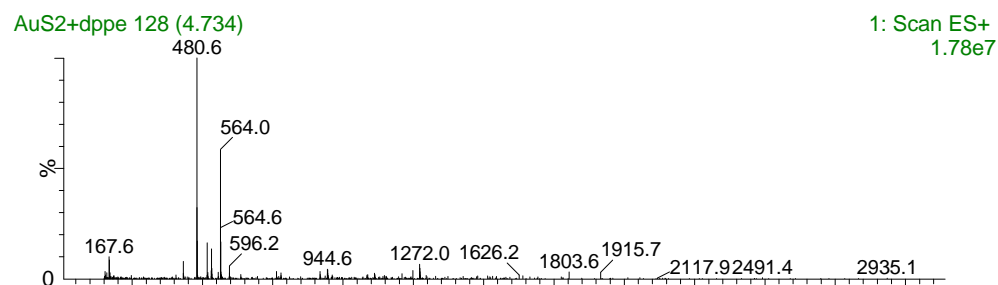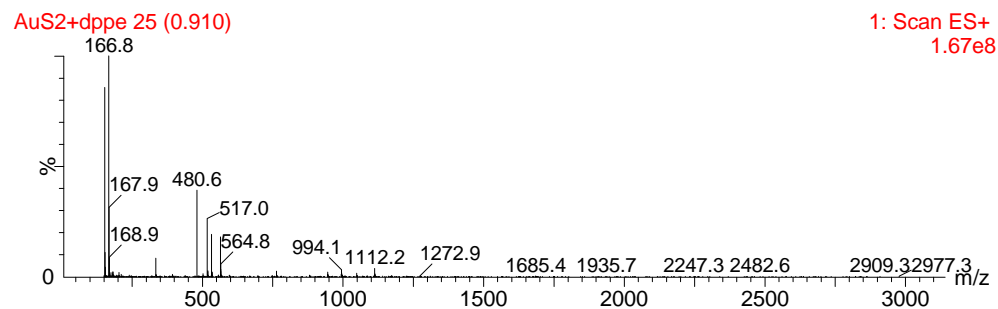

ESI mass spectrum of compound 2

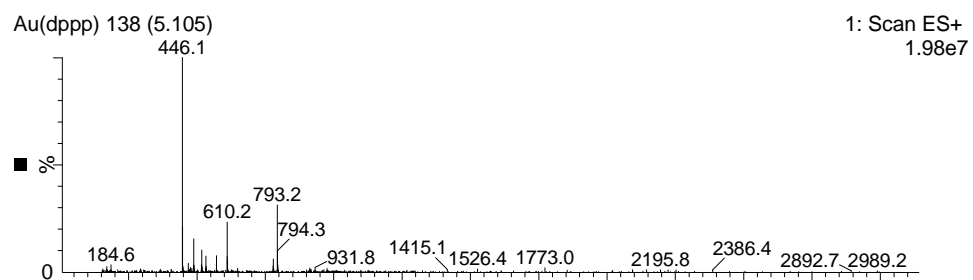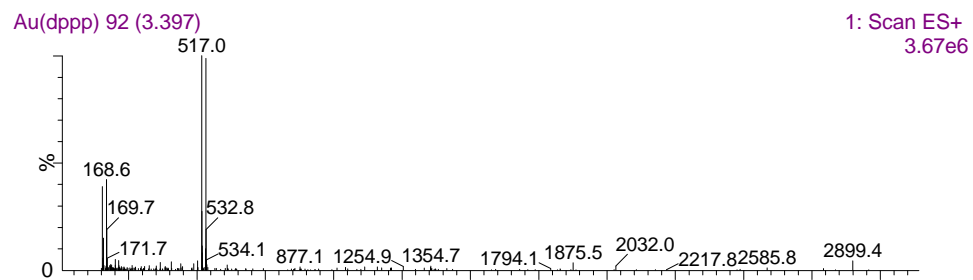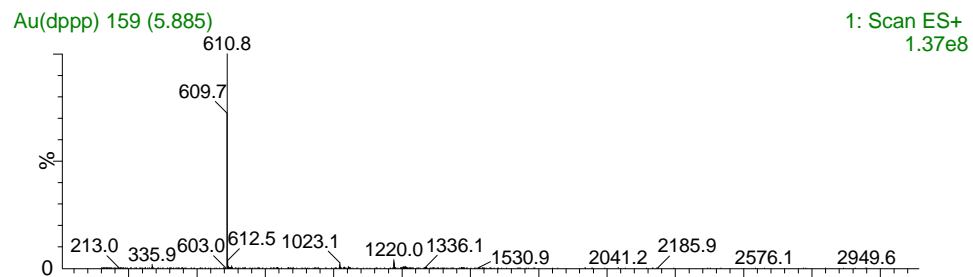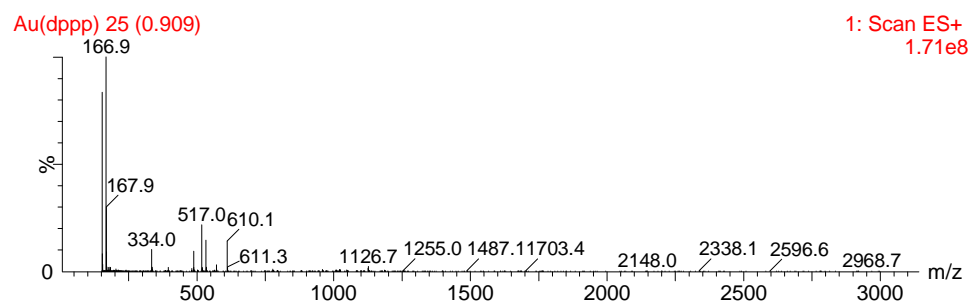

### ESI mass spectrum of compound 3

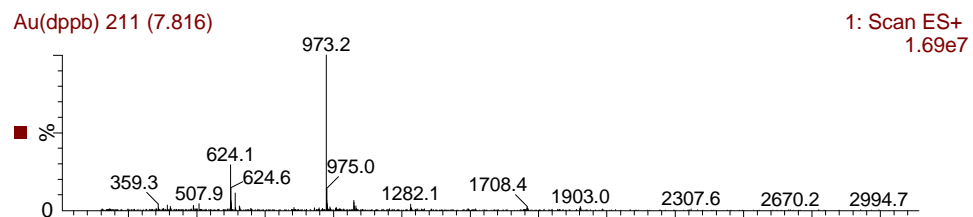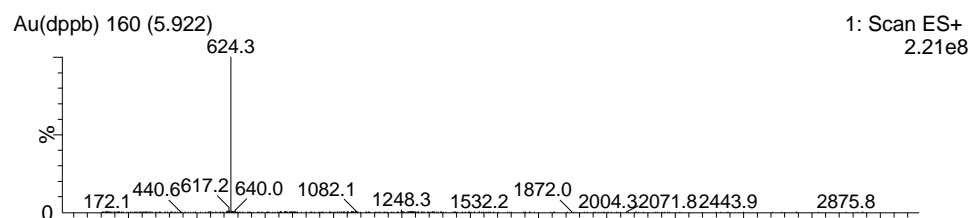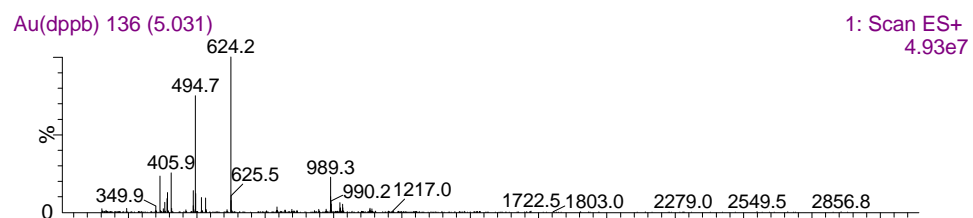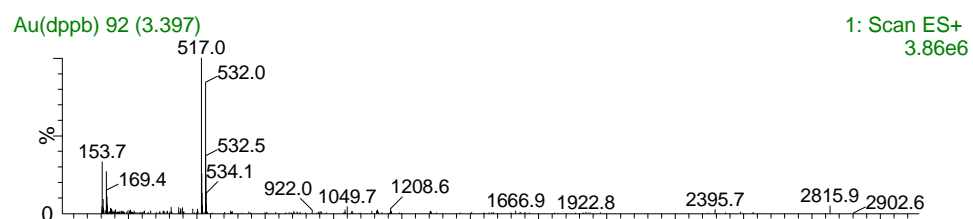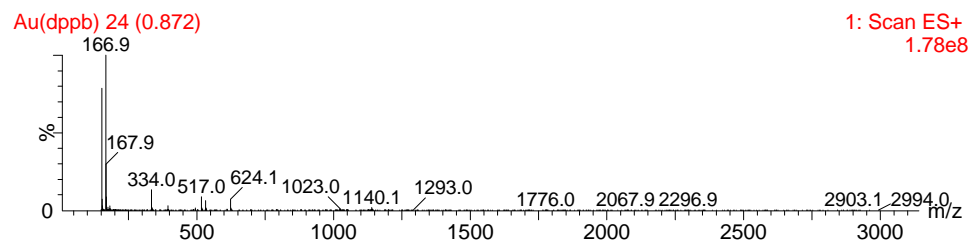

ESI mass spectrum of compound 4

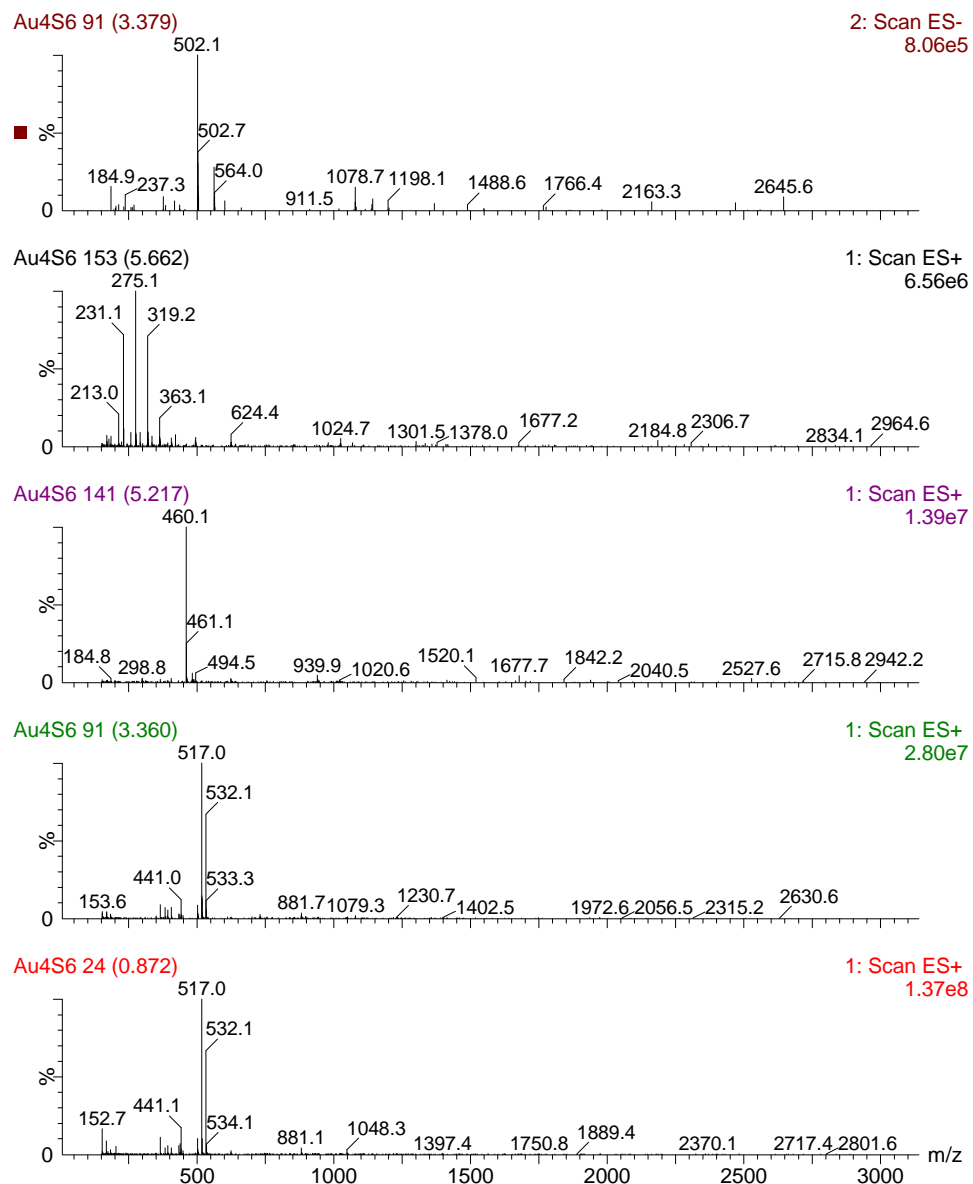

Supplement: c0dt00620c.pdf [file c0dt00620c.pdf]
